# Supplementary material for: Enhanced Malignant Phenotypes of Glioblastoma Cells Surviving NPe6-Mediated Photodynamic Therapy are Regulated via ERK1/2 Activation
Source: MDPI journal article supplement (doi:10.3390/cancers12123641), 2020-12-04

Figure 1B: T98G Cleaved PARP

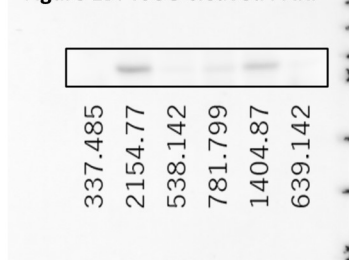

Figure 1B: U343MG Cleaved PARP

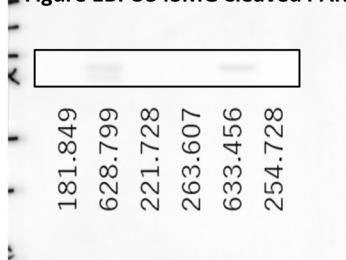

Figure 1B: T98G GAPDH

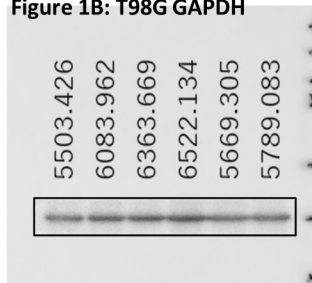

Figure 1B: U343MG GAPDH

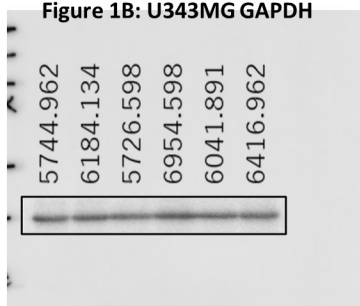

Figure 1D: T98G Bax crosslinker+

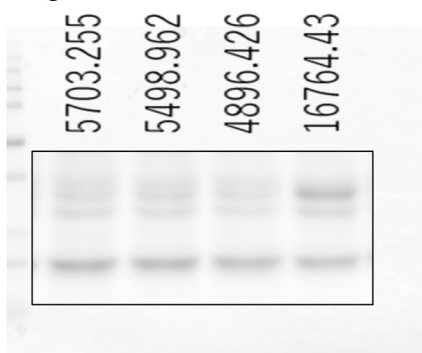

Figure 1D: U343G Bax crosslinker+

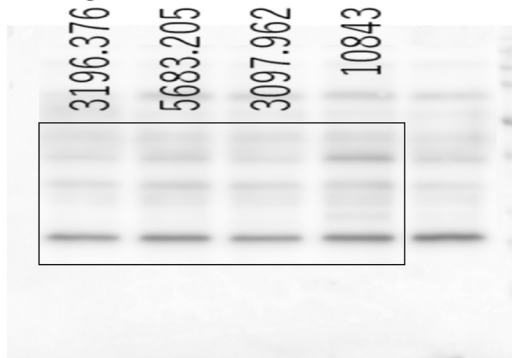

Figure 1D: T98G Bax crosslinker-

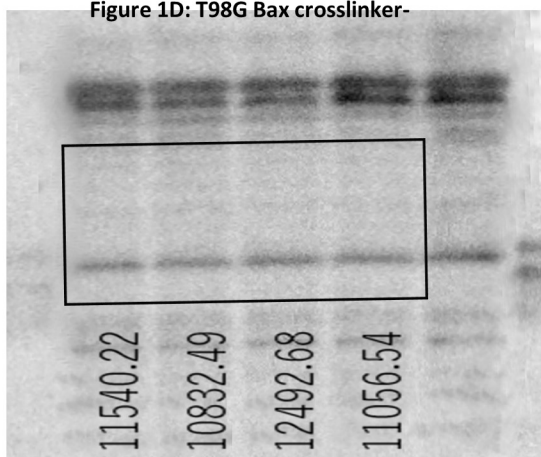

Figure 1D: U343MG Bax crosslinker-

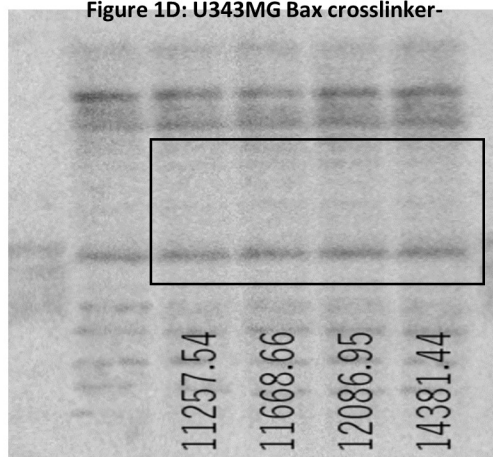

Figure 2A: T98G PAR

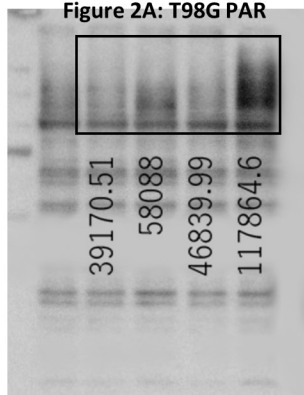

Figure 2A: U343MG PAR

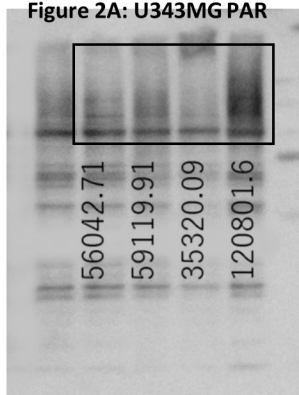

Figure 2A: T98G GAPDH

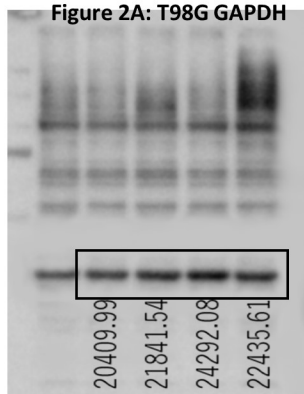

Figure 2A: U343MG GAPDH

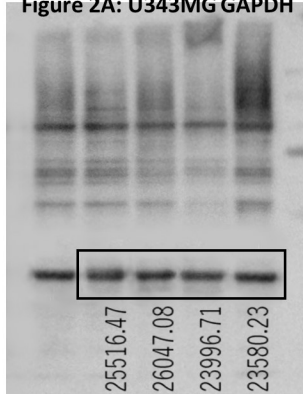

Figure 2C: T98G PAR

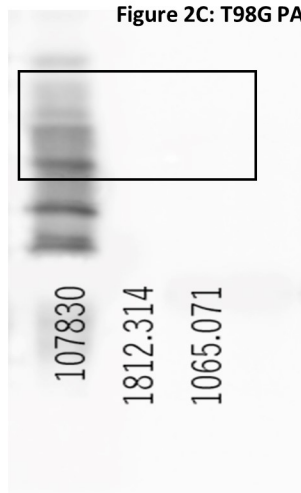

Figure 2C: U343MG PAR

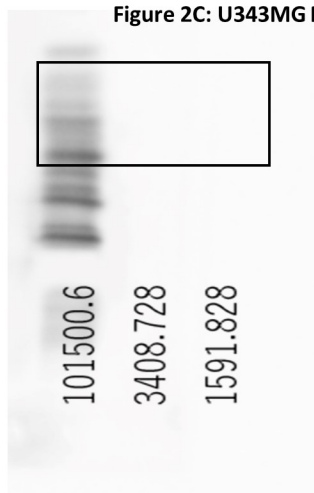

Figure 2C: T98G GAPDH

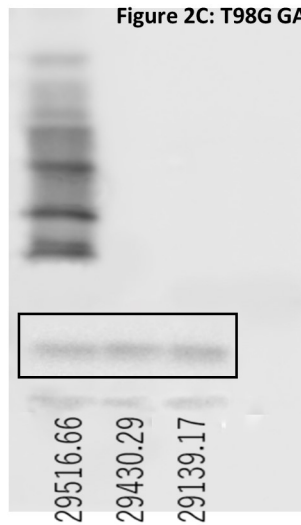

Figure 2C: U343MG GAPDH

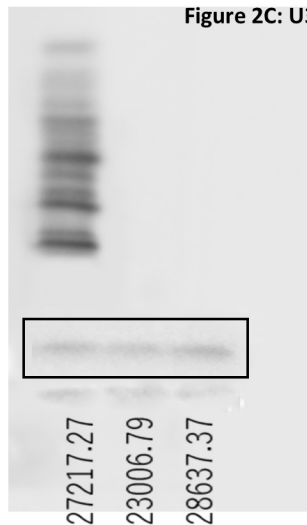

Figure 2C: T98G Cyt C  
(mitochondria)

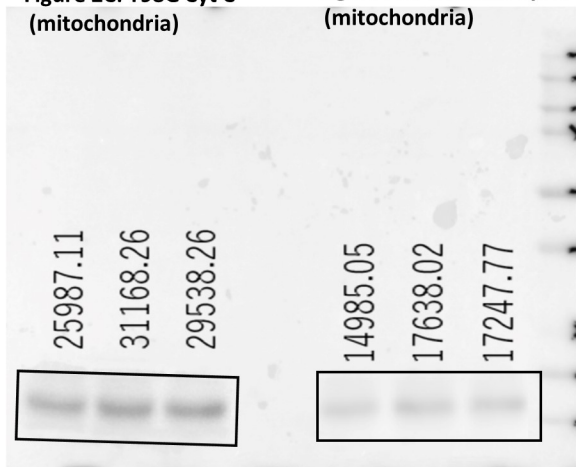

Figure 2C: U343MG Cyt C  
(mitochondria)

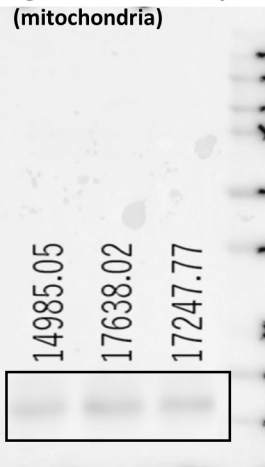

Figure 2C: T98G AIF  
(mitochondria)

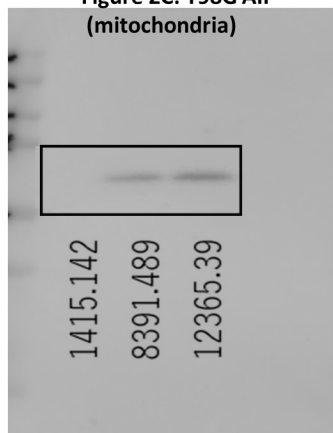

Figure 2C: U343MG AIF  
(mitochondria)

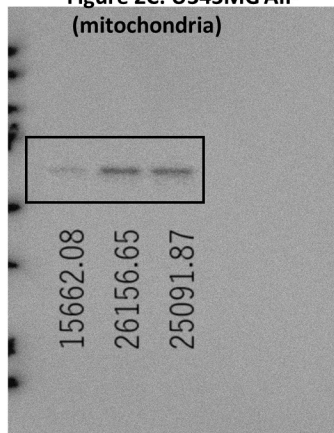

Figure 2C: T98G ATP5H

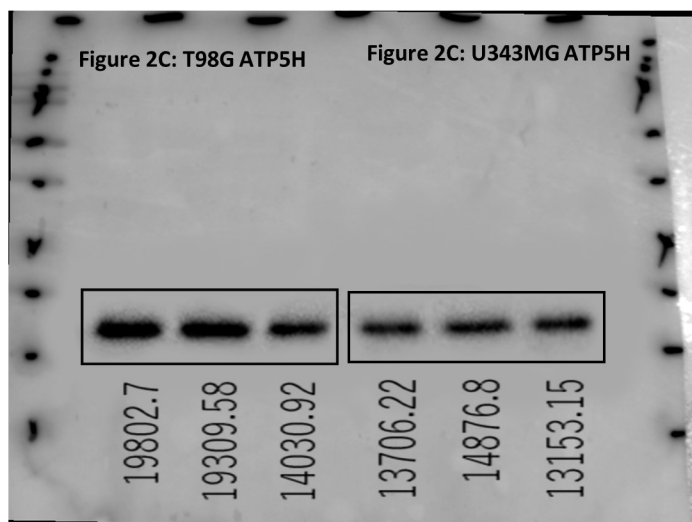

Figure 2C: U343MG ATP5H

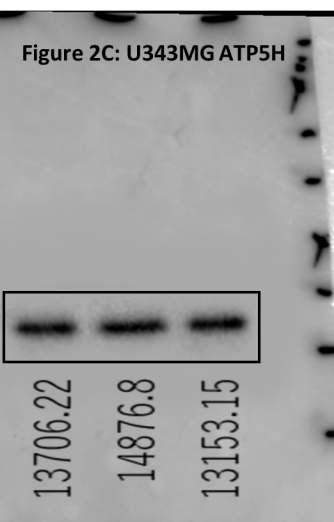

Figure 2C: T98G Cyt C  
(cytosol)

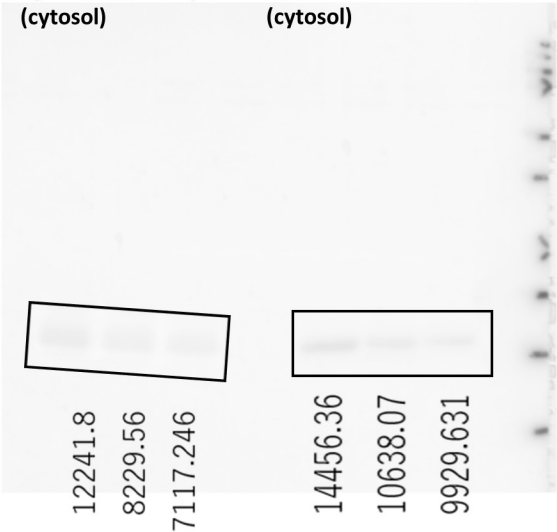

Figure 2C: U343MG Cyt C  
(cytosol)

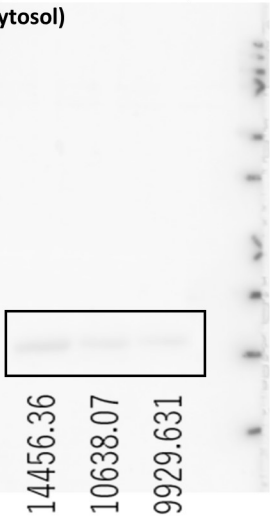

Figure 2C: T98G AIF  
(nuclear)

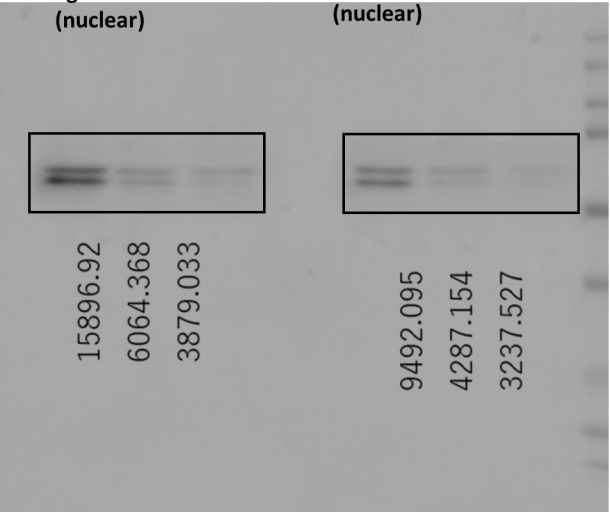

Figure 2C: U343MG AIF  
(nuclear)

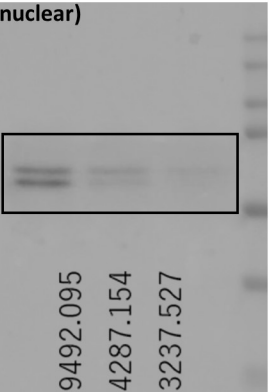

Figure 2C: T98G GAPDH

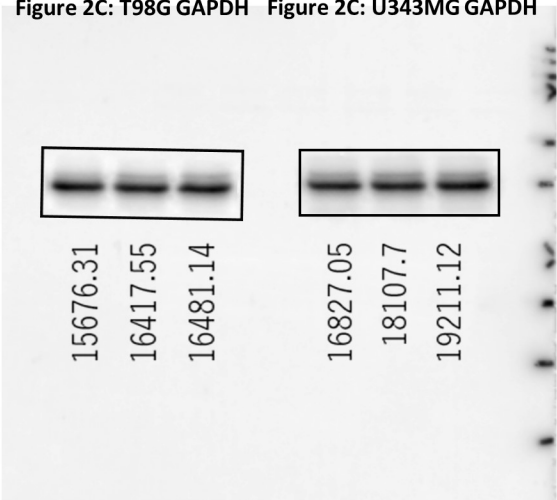

Figure 2C: U343MG GAPDH

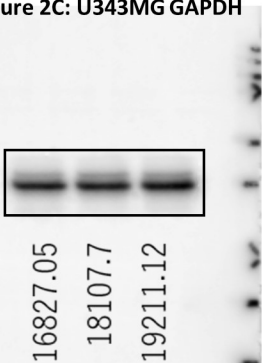

Figure 2C: T98G Myc  
(nuclear)

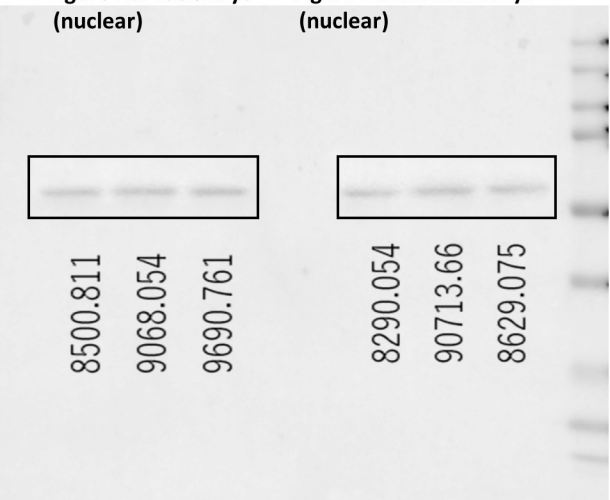

Figure 2C: U343MG Myc  
(nuclear)

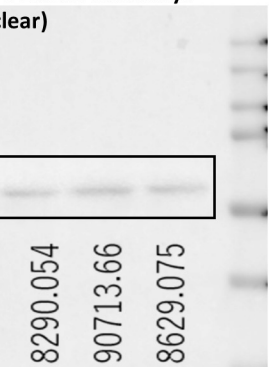

**Figure 3a:**  
**T98G Bax**

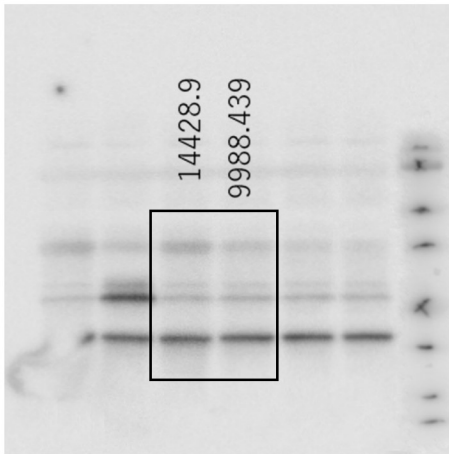

**Figure 3a:**  
**U343MG Bax**

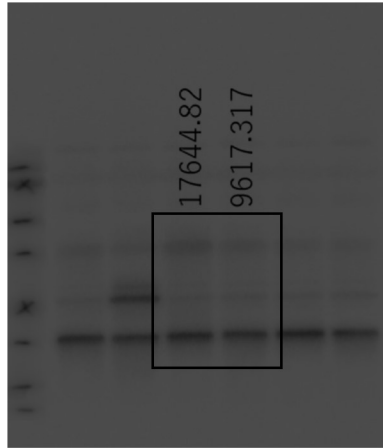

**Figure 3a:**  
**U343MG Cle-PARP**

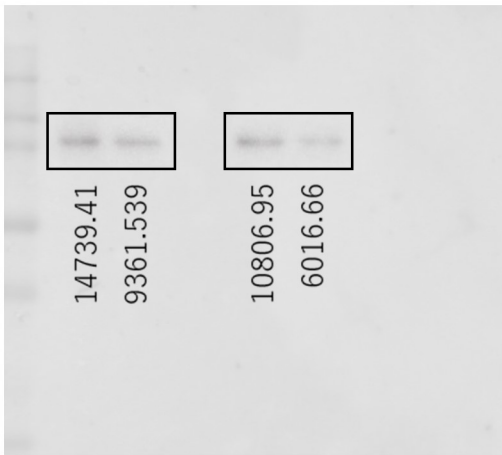

**Figure 3a:**  
**T98G P-ERK1/2**

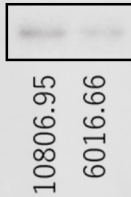

**Figure 3a:**  
**U343MHG GAPDH**

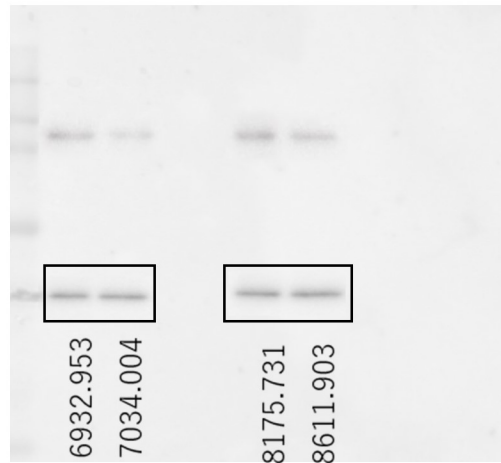

**Figure 3a:**  
**T98G GAPDH**

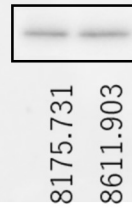

**Figure S3:**  
**T98G P-ERK1/2**

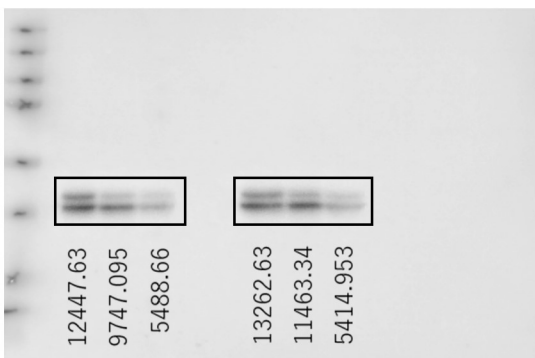

**Figure S3:**  
**U343MG P-ERK1/2**

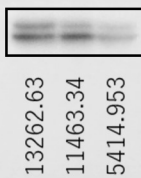

**Figure S3:**  
**T98G GAPDH**

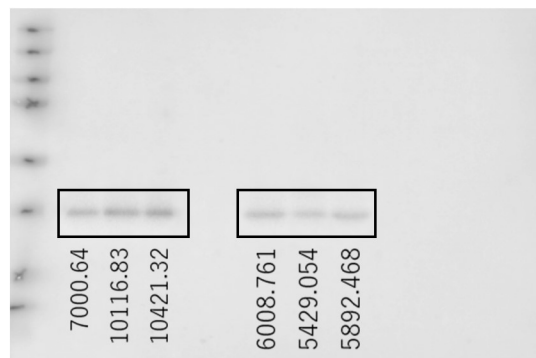

**Figure S3:**  
**U343MG GAPDH**

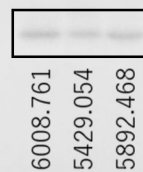

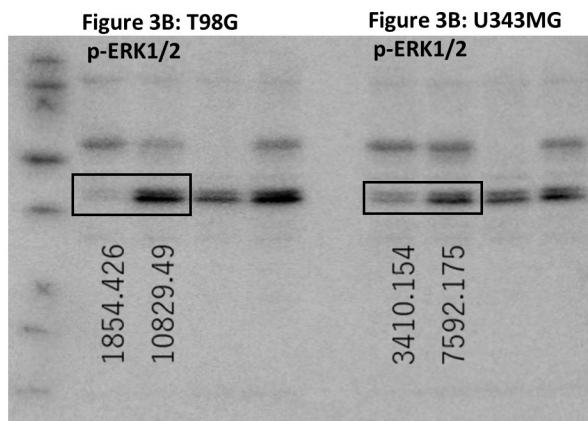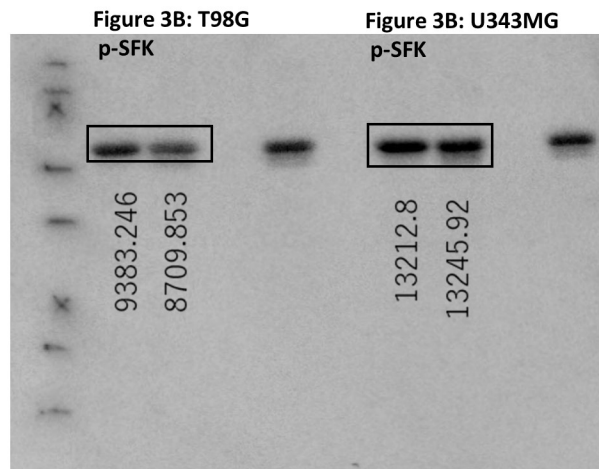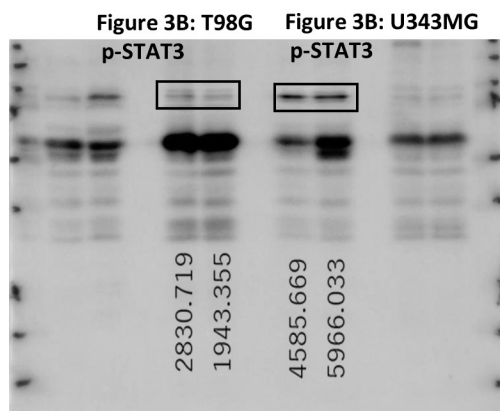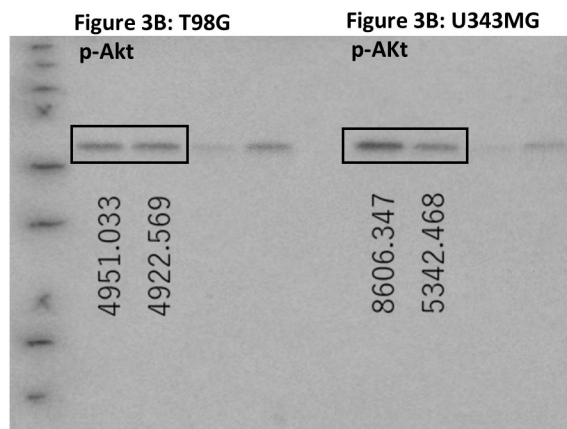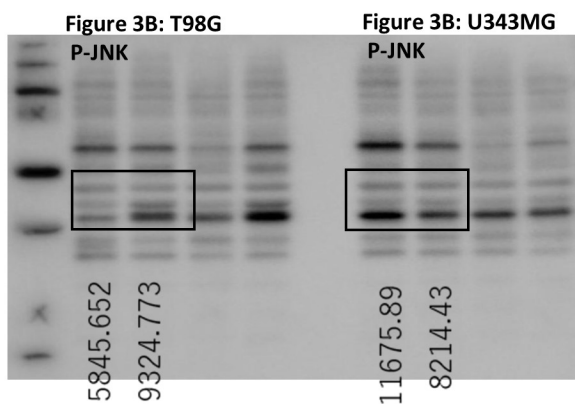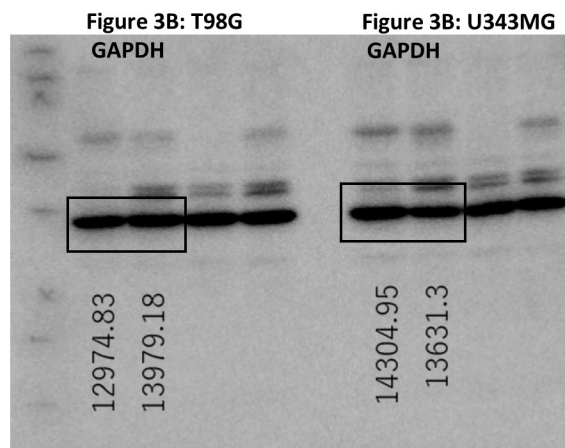

Figure 3C: T98G Bax crosslink

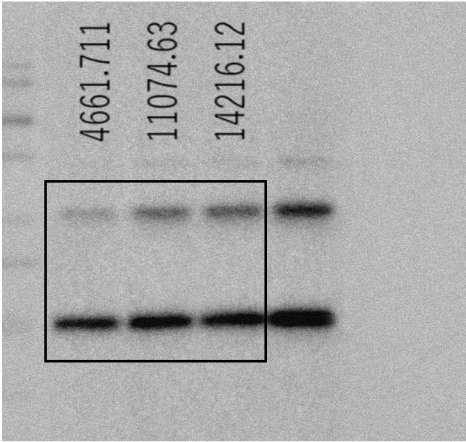

Figure 3C: U343MG Bax crosslink

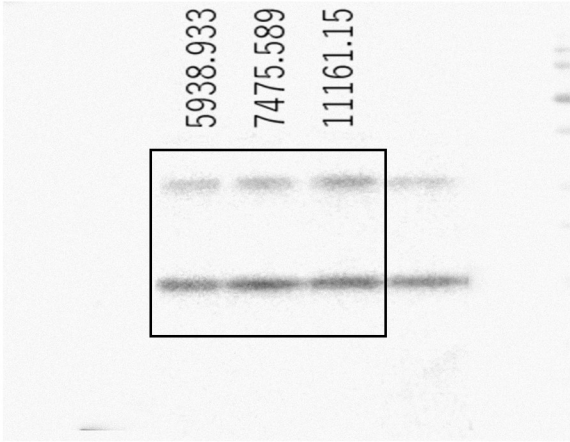

Figure 4B: T98G P-ERK1/2

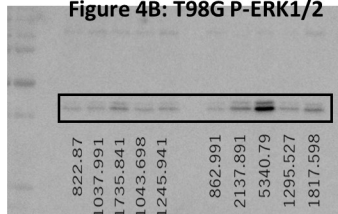

Figure 4B: U343MG P-ERK1/2

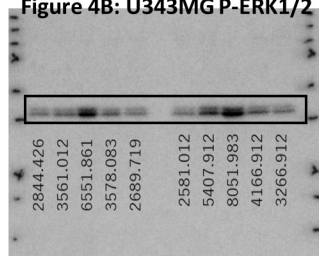

Figure 4B: T98G total-ERK1/2

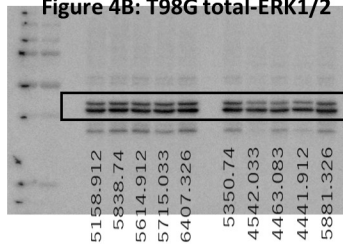

Figure 4B: U343MG total-ERK1/2

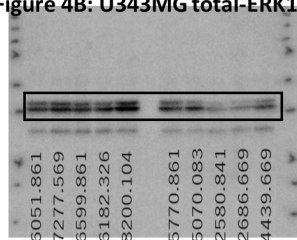

Figure 4B: T98G p-Akt

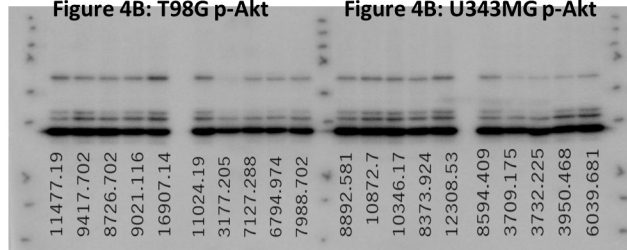

Figure 4B: U343MG p-Akt

Figure 4B: T98G total-Akt

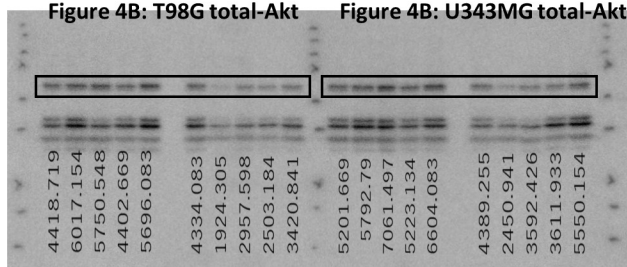

Figure 4B: U343MG total-Akt

Figure 4B: T98G p-STAT3

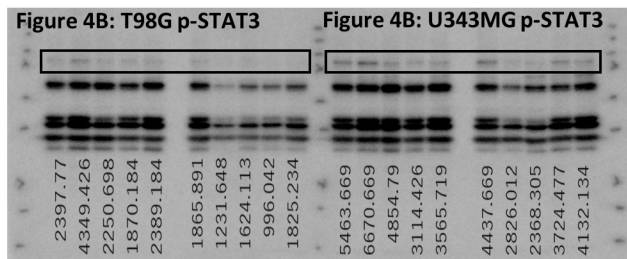

Figure 4B: U343MG p-STAT3

Figure 4B: T98G total-STAT3

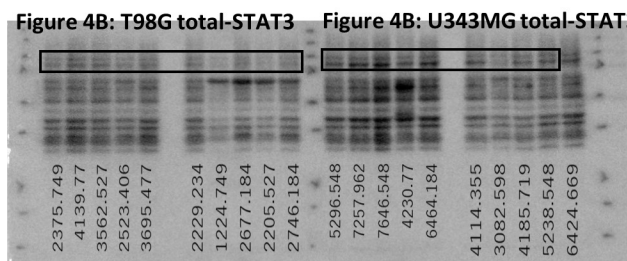

Figure 4B: U343MG total-STAT3



Figure 4B: T98G P-SFK

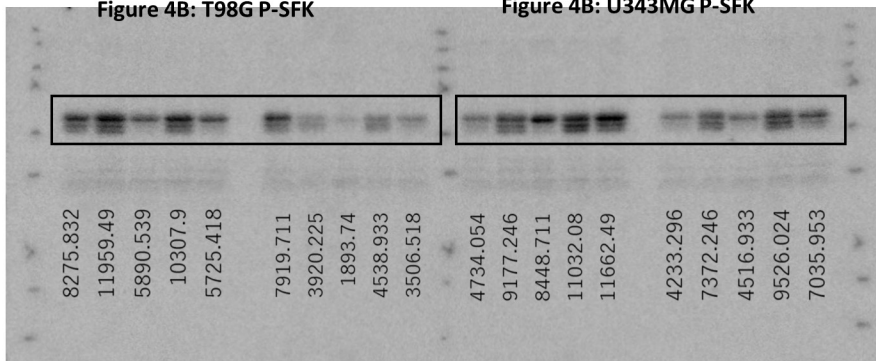

Figure 4B: U343MG P-SFK

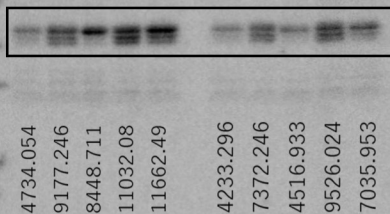

Figure 4B: T98G total c-SRC

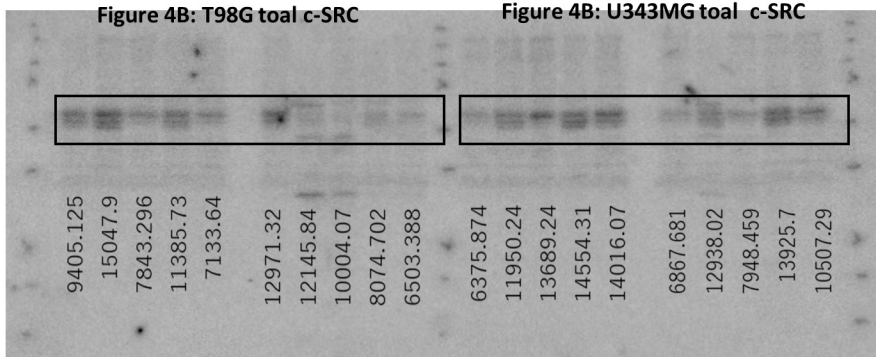

Figure 4B: U343MG total c-SRC

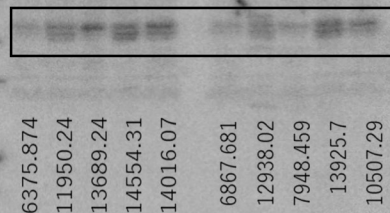

Figure 4B: T98G GAPDH

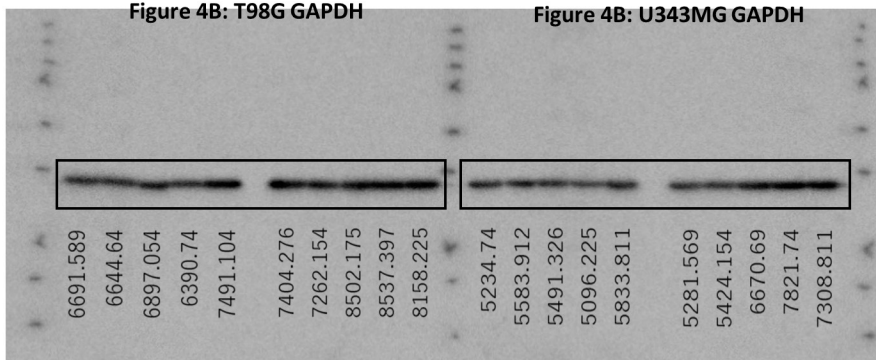

Figure 4B: U343MG GAPDH

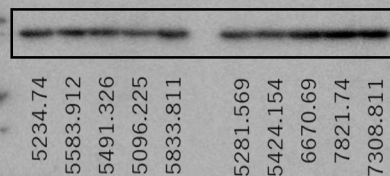

Figure 4C: T98G P-ERK1/2

Figure 4C: U343MG P-ERK1/2

Figure 4C: T98G GAPDH

Figure 4C: U343MG GAPDH

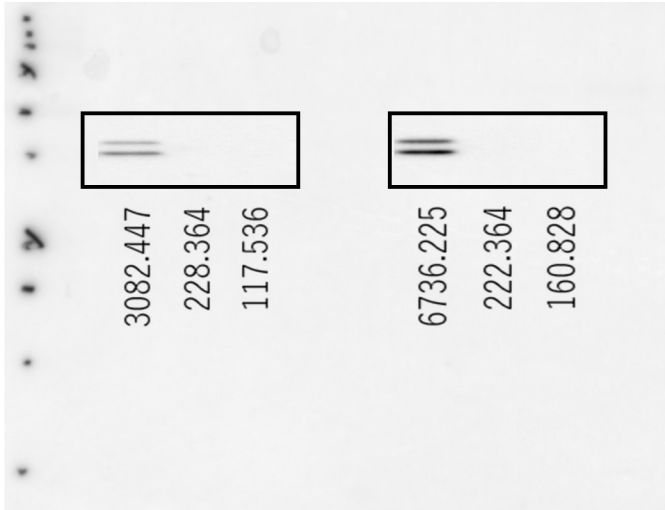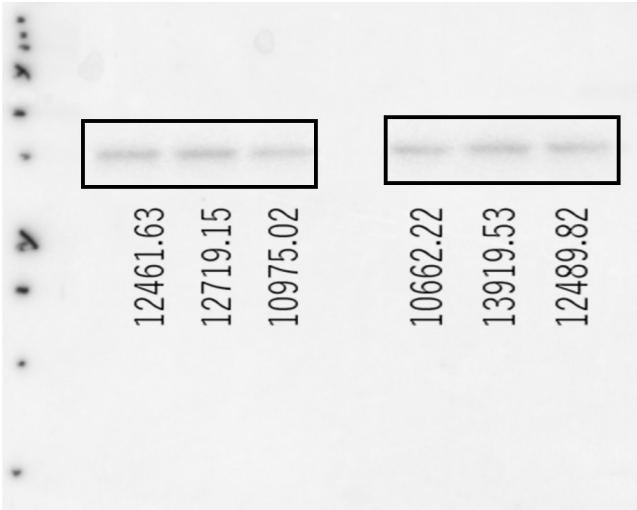

Figure S2: T98G  
whole -Bax

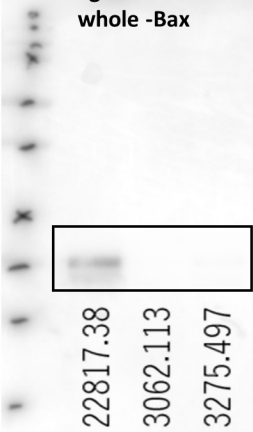

Figure S2: U343G  
whole -Bax

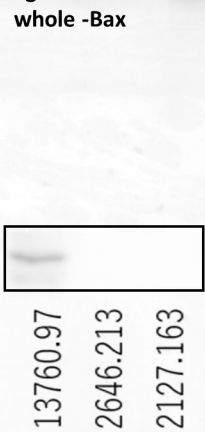

Figure S2: T98G  
whole -Bak

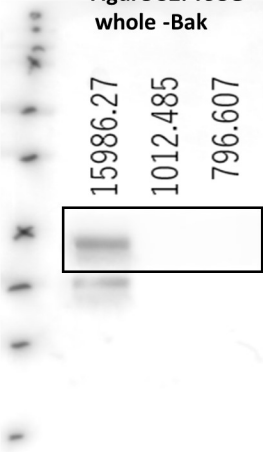

Figure S2: U343G  
whole -Bak

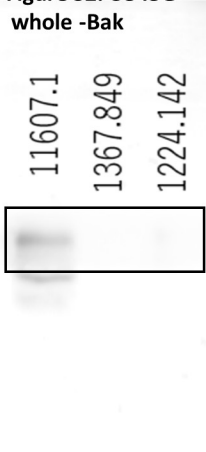

Figure S2: T98G  
whole -GAPDH

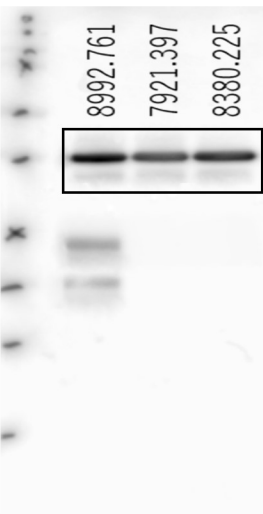

Figure S2: U343G  
whole -GAPDH

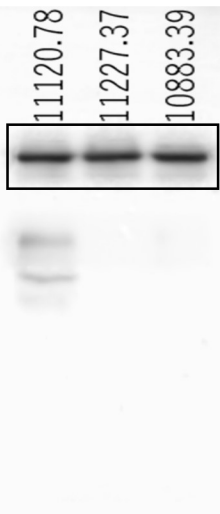

Figure S2: T98G  
Cyt C

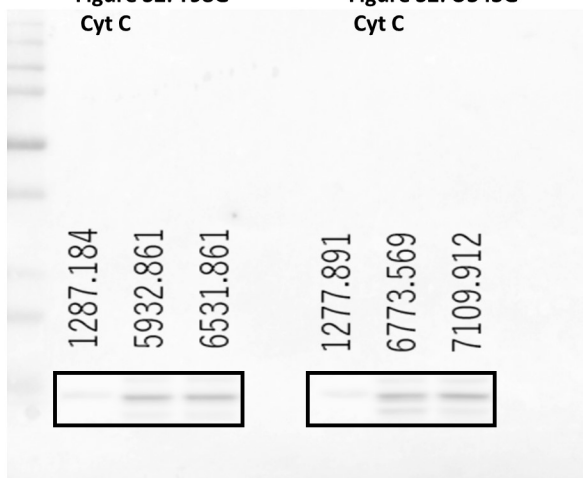

Figure S2: U343G  
Cyt C

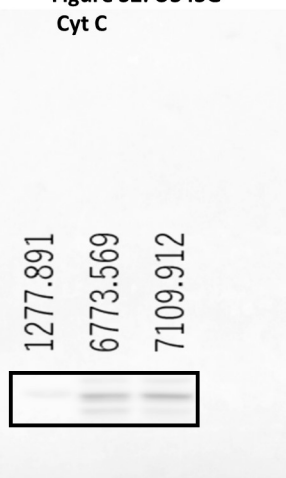

Figure S2: T98G  
AIF

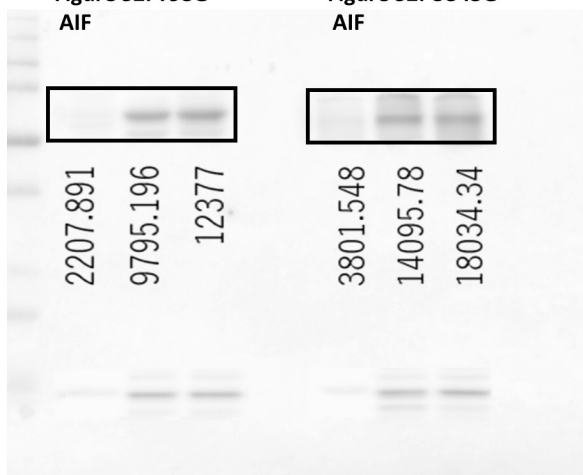

Figure S2: U343G  
AIF

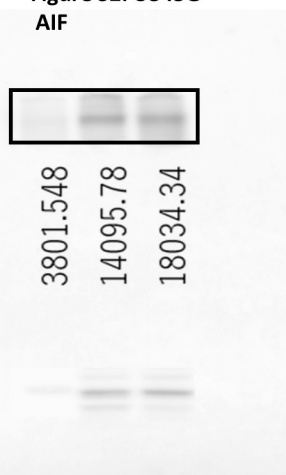

Figure S2: T98G  
ATP5H

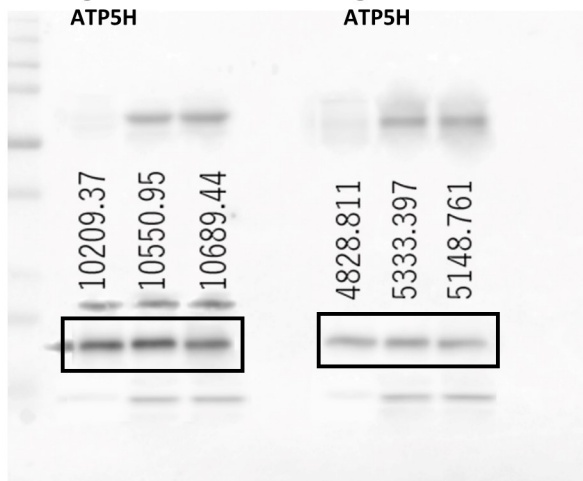

Figure S2: U343G  
ATP5H

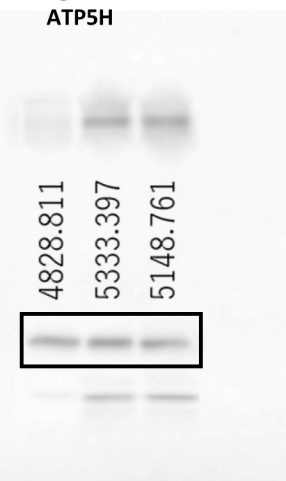

Figure S4 CD44

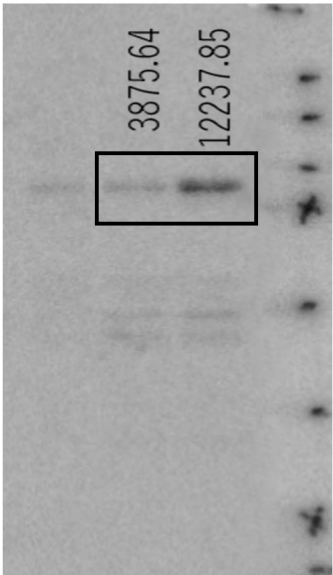

Figure S4 Actin

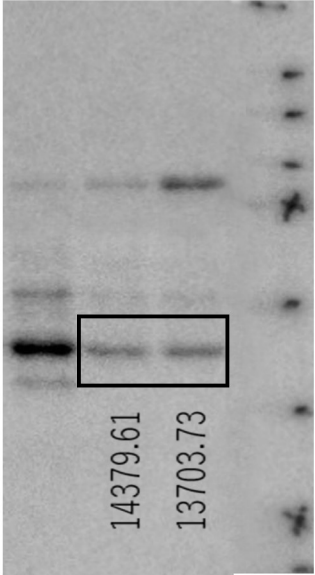

Supplement: s1 [file s1]
